# Supplementary material
Source: PubMed Central journal article supplement (PMC3572272)
Supplement: NIHMS437307-supplement-2_si_002.pdf [file NIHMS437307-supplement-2_si_002.pdf]

## Supporting Information

### **Nanoscale Mechanism of Molecular Transport through the Nuclear Pore Complex as Studied by Scanning Electrochemical Microscopy**

Jiyeon Kim, Anahita Izadyar,<sup>†</sup> Nikoloz Nioradze, and Shigeru Amemiya\*

*Department of Chemistry, University of Pittsburgh, Pittsburgh, PA 15260, USA*

\* To whom correspondence should be addressed. E-mail: amemiya@pitt.edu.

<sup>†</sup> Present address: Department of Chemistry and Physics, Arkansas State University, State University,  
Arkansas, 72467

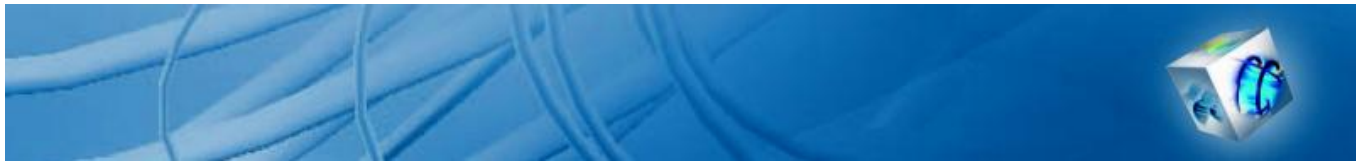

# COMSOL Model Report

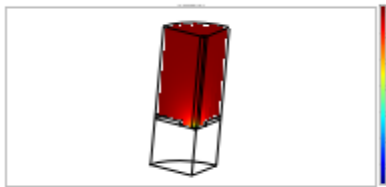

## 1. Table of Contents

- Title - COMSOL Model Report
- Table of Contents
- Model Properties
- Geometry
- Geom1
- Geom3
- Geom2
- Geom4
- Solver Settings
- Postprocessing
- Variables

## 2. Model Properties

| Property       | Value                   |
|----------------|-------------------------|
| Model name     |                         |
| Author         |                         |
| Company        |                         |
| Department     |                         |
| Reference      |                         |
| URL            |                         |
| Saved date     | Aug 29, 2012 4:31:42 PM |
| Creation date  | Aug 28, 2012 9:58:45 PM |
| COMSOL version | COMSOL 3.5.0.603        |

Application modes and modules used in this model:

- Geom1 (3D)
  - Diffusion (Chemical Engineering Module)
  - Diffusion (Chemical Engineering Module)
- Geom3 (2D)
- Geom2 (2D)
- Geom4 (2D)

### 3. Geometry

Number of geometries: 4

#### 3.1. Geom1

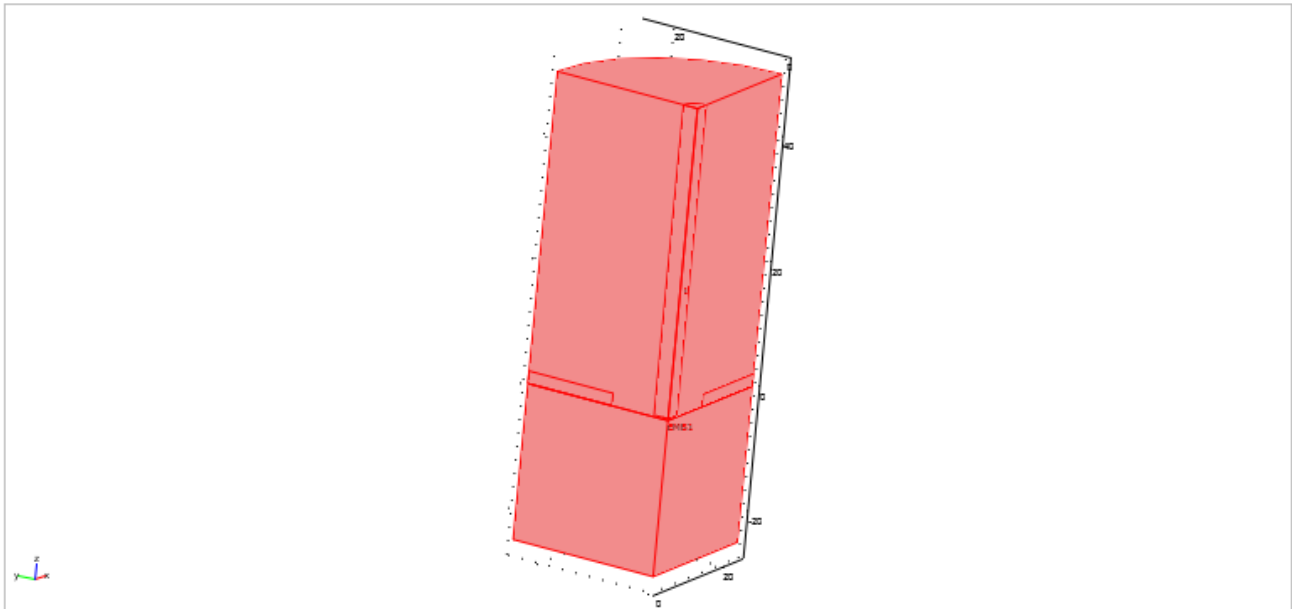

### 3.1.1. Point mode

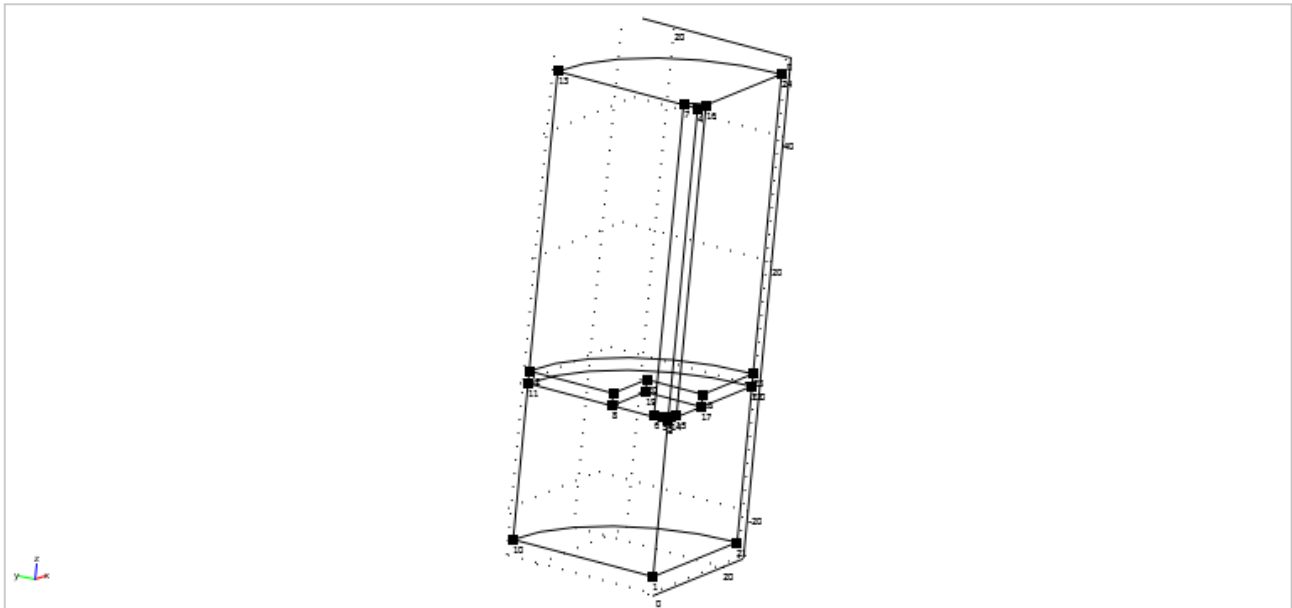

### 3.1.2. Edge mode

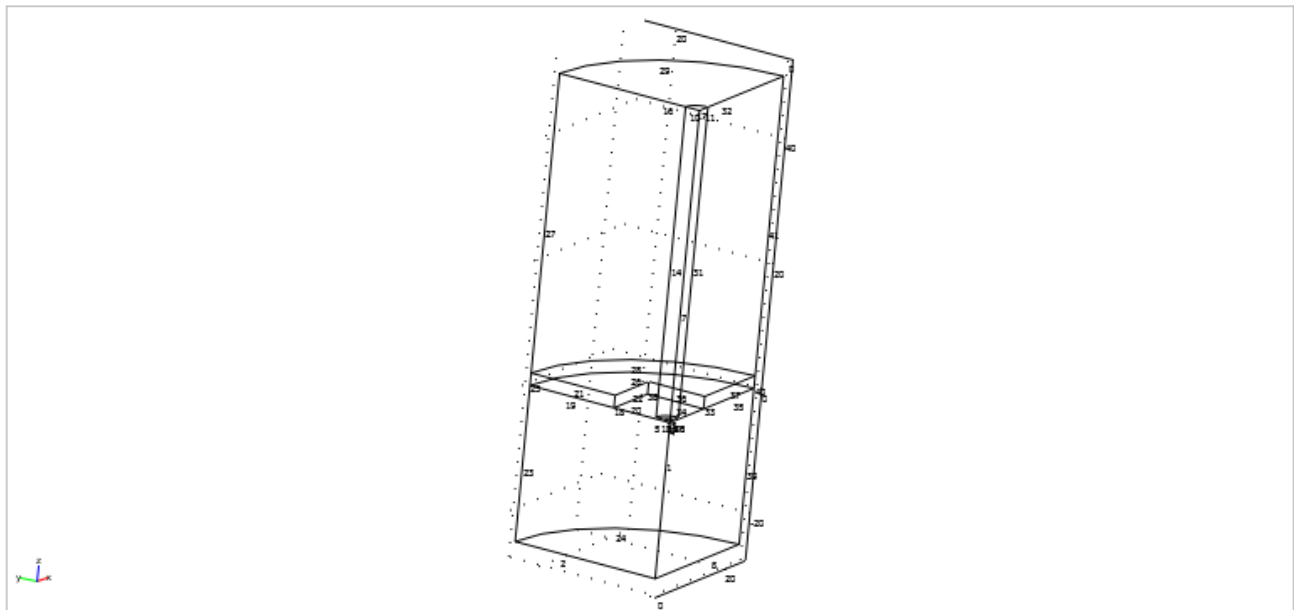

### 3.1.3. Boundary mode

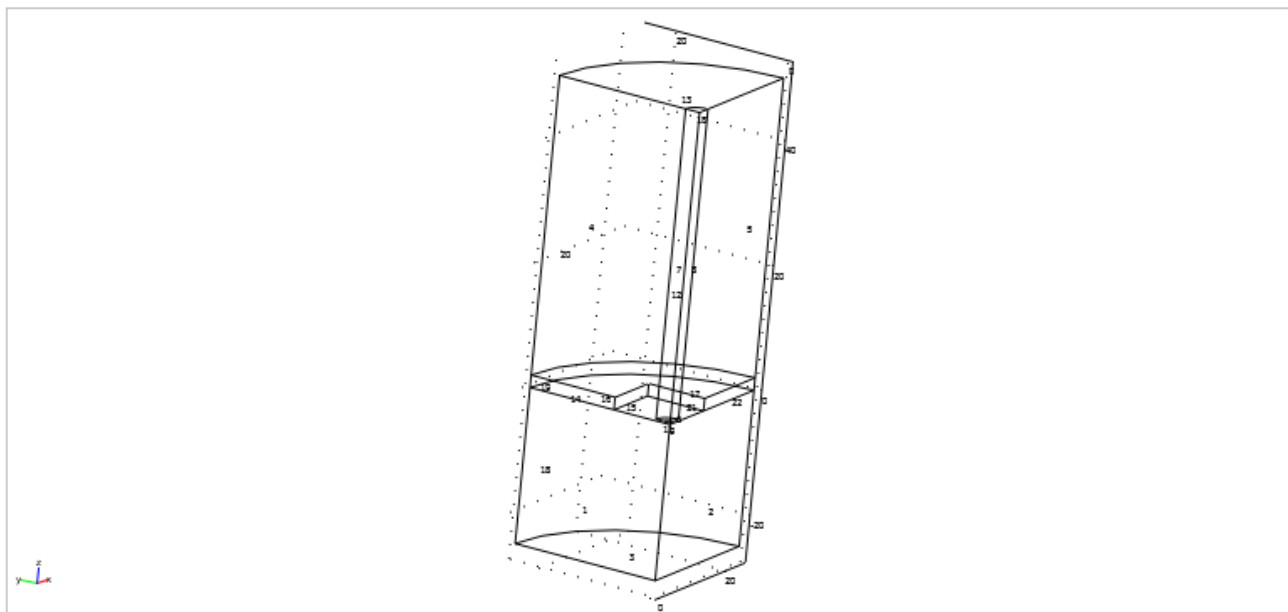

### 3.1.4. Subdomain mode

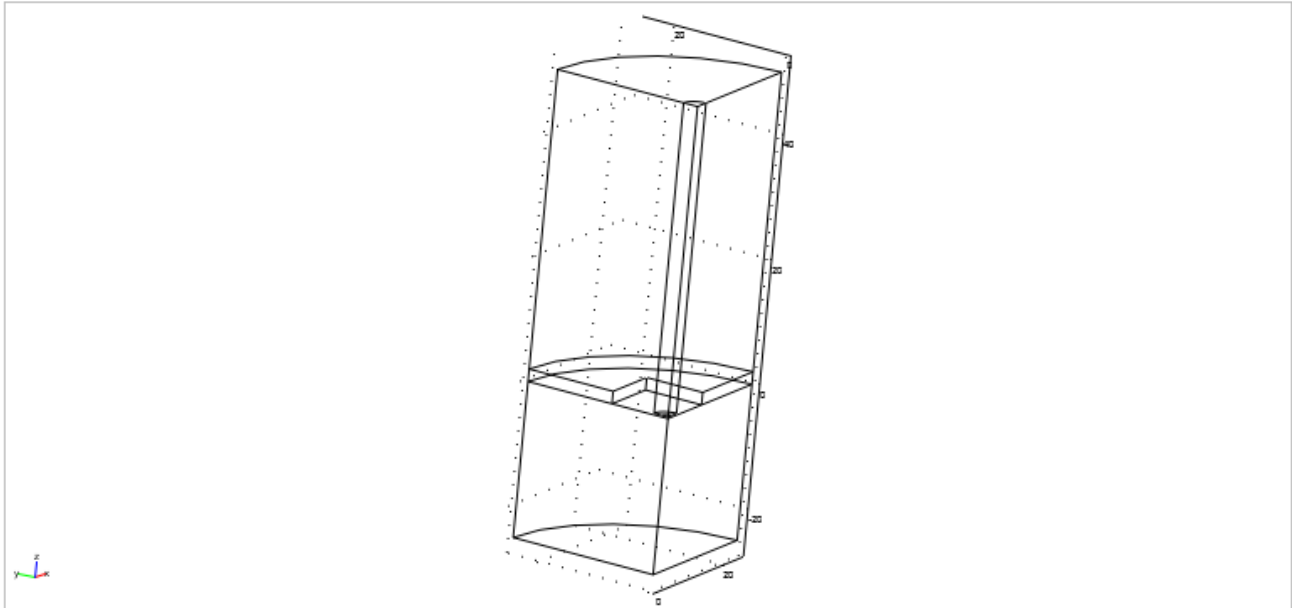

## 3.2. Geom3

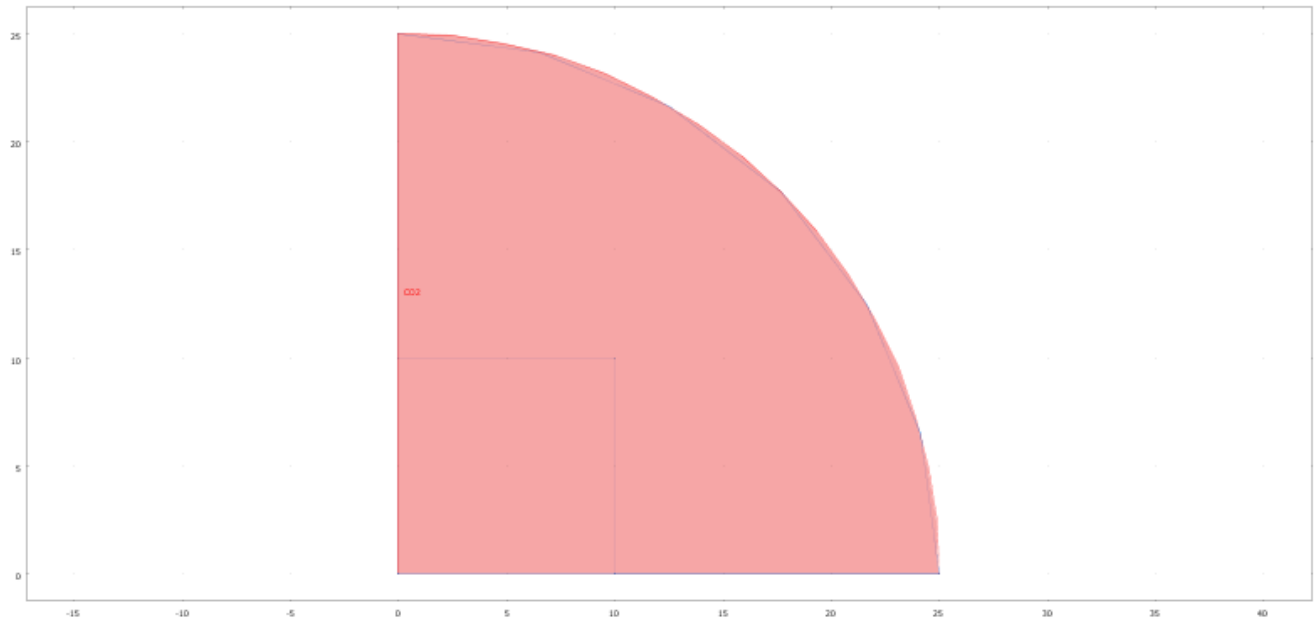



### 3.3. Geom2

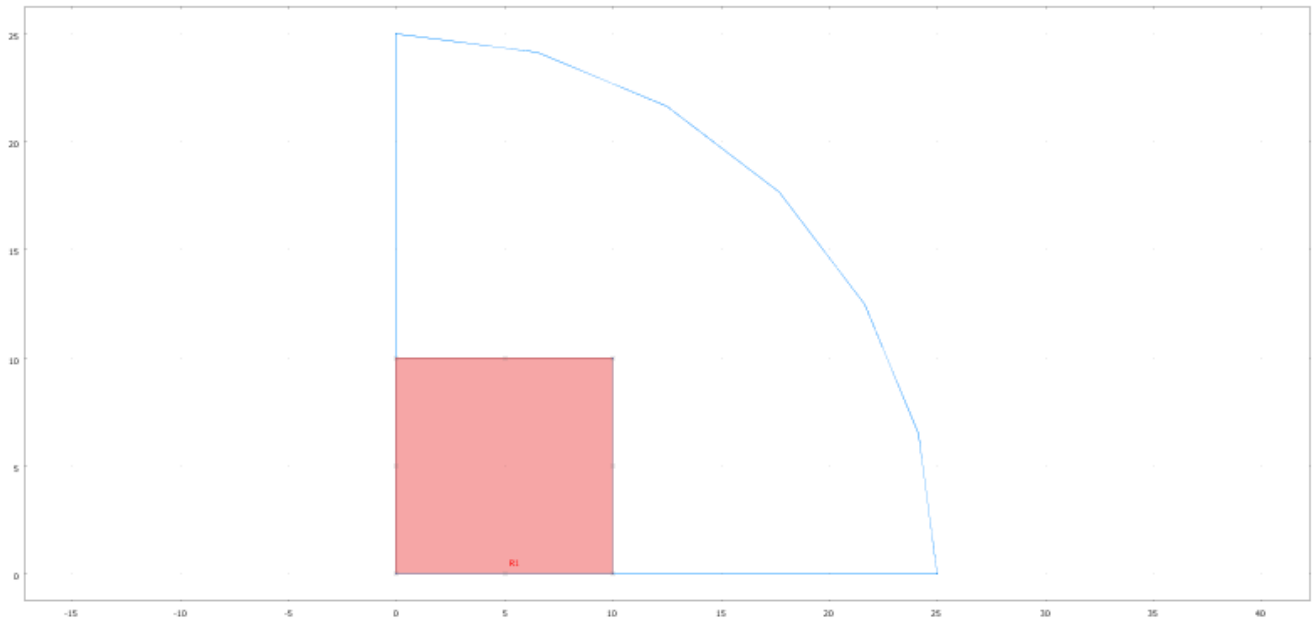

### 3.4. Geom4

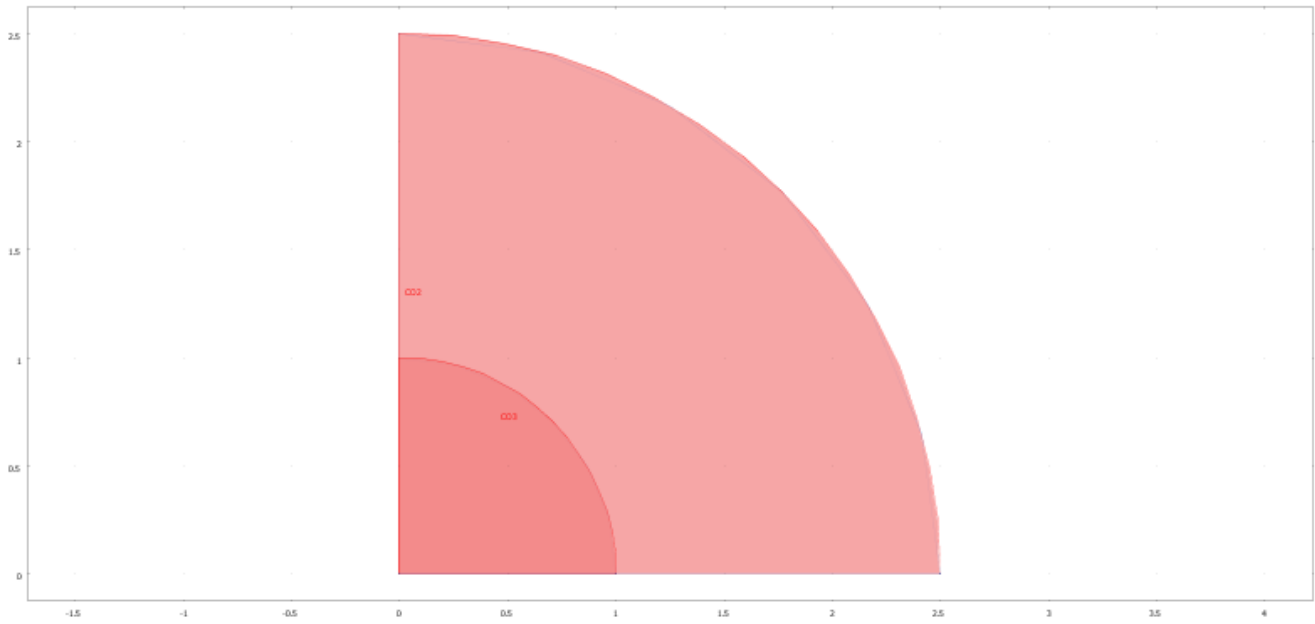

## 4. Geom1

Space dimensions: 3D

Independent variables: x, y, z

### 4.1. Scalar Expressions

| Name | Expression | Unit | Description |
|------|------------|------|-------------|
| K    | 0.5        |      |             |

### 4.2. Mesh

#### 4.2.1. Mesh Statistics

|                              |        |
|------------------------------|--------|
| Number of degrees of freedom | 299204 |
| Number of mesh points        | 65778  |
| Number of elements           | 382135 |
| Tetrahedral                  | 382135 |
| Prism                        | 0      |
| Hexahedral                   | 0      |
| Number of boundary elements  | 38136  |
| Triangular                   | 38136  |
| Quadrilateral                | 0      |
| Number of edge elements      | 740    |
| Number of vertex elements    | 24     |
| Minimum element quality      | 0.254  |
| Element volume ratio         | 0      |

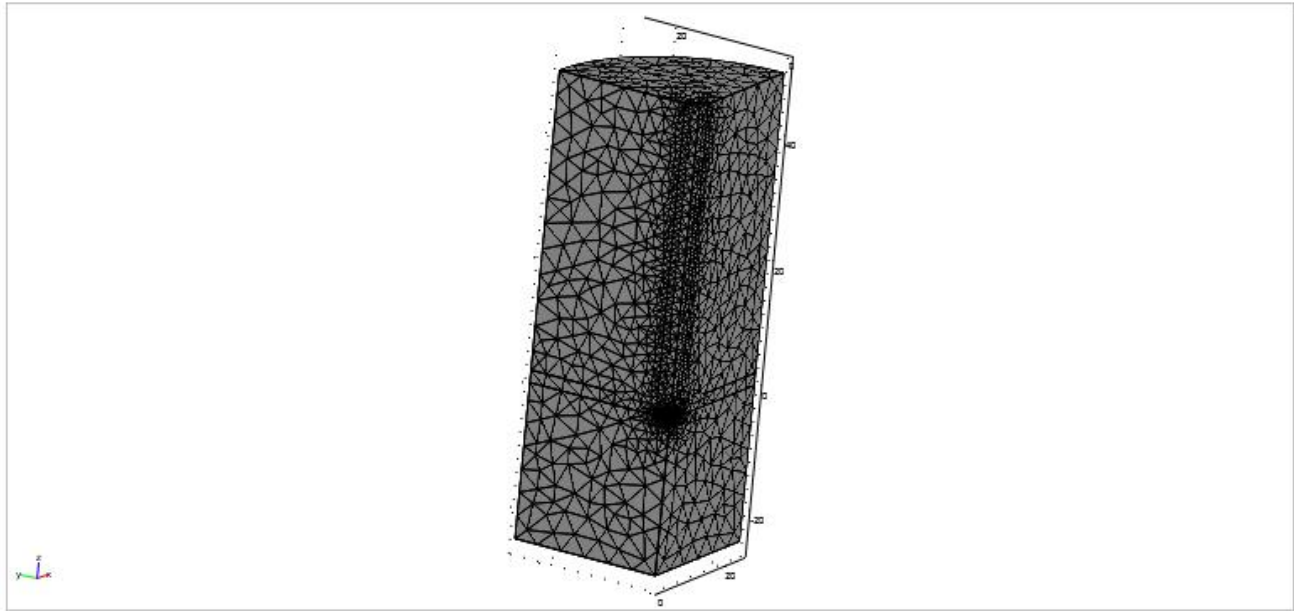

## 4.3. Application Mode: Diffusion (chdi)

Application mode type: Diffusion (Chemical Engineering Module)

Application mode name: chdi

### 4.3.1. Application Mode Properties

| Property               | Value                |
|------------------------|----------------------|
| Default element type   | Lagrange - Quadratic |
| Analysis type          | Stationary           |
| Equilibrium assumption | Off                  |
| Frame                  | Frame (ref)          |
| Weak constraints       | Off                  |
| Constraint type        | Ideal                |

### 4.3.2. Variables

Dependent variables: c

Shape functions: shlag(2,'c')

Interior boundaries not active

### 4.3.3. Boundary Settings

|                                |                    |               |                        |               |
|--------------------------------|--------------------|---------------|------------------------|---------------|
| Boundary                       |                    | 13, 20        | 4-5, 11-12, 15, 17, 21 | 9             |
| Type                           |                    | Concentration | Insulation/Symmetry    | Concentration |
| Mass transfer coefficient (kc) | m/s                | 0             | 0                      | 0             |
| Bulk concentration (cb)        | mol/m <sup>3</sup> | 0             | 0                      | 0             |
| Concentration (c0)             | mol/m <sup>3</sup> | <b>1</b>      | 0                      | 0             |
| Boundary                       |                    | 6             |                        |               |
| Type                           |                    | Flux          |                        |               |
| Mass transfer coefficient (kc) | m/s                | <b>K</b>      |                        |               |
| Bulk concentration (cb)        | mol/m <sup>3</sup> | <b>c2</b>     |                        |               |
| Concentration (c0)             | mol/m <sup>3</sup> | 0             |                        |               |

### 4.3.4. Subdomain Settings

The subdomain settings only contain default values.

|                         |                    |   |
|-------------------------|--------------------|---|
| Subdomain initial value |                    | 2 |
| Concentration, c (c)    | mol/m <sup>3</sup> | 1 |

## 4.4. Application Mode: Diffusion (chdi2)

Application mode type: Diffusion (Chemical Engineering Module)

Application mode name: chdi2

### 4.4.1. Application Mode Properties

| Property               | Value                |
|------------------------|----------------------|
| Default element type   | Lagrange - Quadratic |
| Analysis type          | Stationary           |
| Equilibrium assumption | Off                  |
| Frame                  | Frame (ref)          |
| Weak constraints       | Off                  |
| Constraint type        | Ideal                |

### 4.4.2. Variables

Dependent variables: c2

Shape functions: shlag(2,'c2')

Interior boundaries not active

### 4.4.3. Boundary Settings

|                                |                    |                     |               |          |
|--------------------------------|--------------------|---------------------|---------------|----------|
| Boundary                       |                    | 1-2, 16             | 3, 18         | 6        |
| Type                           |                    | Insulation/Symmetry | Concentration | Flux     |
| Mass transfer coefficient (kc) | m/s                | 0                   | 0             | <b>K</b> |
| Bulk concentration (cb)        | mol/m <sup>3</sup> | 0                   | 0             | <b>c</b> |
| Concentration (c0)             | mol/m <sup>3</sup> | 0                   | <b>1</b>      | 0        |

### 4.4.4. Subdomain Settings

The subdomain settings only contain default values.

|                         |                    |   |
|-------------------------|--------------------|---|
| Subdomain initial value |                    | 1 |
| Concentration, c2 (c2)  | mol/m <sup>3</sup> | 1 |

## 5. Geom3

Space dimensions: 2D

Independent variables: x, y, z

## 6. Geom2

Space dimensions: 2D

Independent variables: x, y, z

## 7. Geom4

Space dimensions: 2D

Independent variables: x, y, z

## 8. Solver Settings

Solve using a script: off

|                          |            |
|--------------------------|------------|
| Analysis type            | Stationary |
| Auto select solver       | On         |
| Solver                   | Stationary |
| Solution form            | Automatic  |
| Symmetric                | auto       |
| Adaptive mesh refinement | Off        |
| Optimization/Sensitivity | Off        |
| Plot while solving       | Off        |

### 8.1. Conjugate gradients

Solver type: Linear system solver

| Parameter                    | Value  |
|------------------------------|--------|
| Relative tolerance           | 1.0E-6 |
| Factor in error estimate     | 400.0  |
| Maximum number of iterations | 10000  |
| Preconditioning              | Left   |

### 8.1.1. Algebraic multigrid

Solver type: Preconditioner

| Parameter                      | Value   |
|--------------------------------|---------|
| Number of iterations           | 2       |
| Multigrid cycle                | V-cycle |
| Maximum number of levels       | 6       |
| Max DOFs at coarsest level     | 5000    |
| Quality of multigrid hierarchy | 3       |

#### 8.1.1.1. SOR

Solver type: Presmoothing

| Parameter                      | Value |
|--------------------------------|-------|
| Number of iterations           | 2     |
| Relaxation factor ( $\omega$ ) | 1.0   |
| Blocked version                | On    |

#### 8.1.1.2. SORU

Solver type: Postsmoothing

| Parameter                      | Value |
|--------------------------------|-------|
| Number of iterations           | 2     |
| Relaxation factor ( $\omega$ ) | 1.0   |
| Blocked version                | On    |

#### 8.1.1.3. UMFPACK

Solver type: Coarse solver

| Parameter                | Value |
|--------------------------|-------|
| Drop tolerance           | 0.0   |
| Pivot threshold          | 0.1   |
| Memory allocation factor | 0.7   |



## 8.2. Stationary

| Parameter                           | Value     |
|-------------------------------------|-----------|
| Linearity                           | Automatic |
| Relative tolerance                  | 1.0E-6    |
| Maximum number of iterations        | 25        |
| Manual tuning of damping parameters | Off       |
| Highly nonlinear problem            | Off       |
| Initial damping factor              | 1.0       |
| Minimum damping factor              | 1.0E-4    |
| Restriction for step size update    | 10.0      |

## 8.3. Advanced

| Parameter                                                              | Value       |
|------------------------------------------------------------------------|-------------|
| Constraint handling method                                             | Elimination |
| Null-space function                                                    | Automatic   |
| Automatic assembly block size                                          | On          |
| Assembly block size                                                    | 1000        |
| Use Hermitian transpose of constraint matrix and in symmetry detection | Off         |
| Use complex functions with real input                                  | Off         |
| Stop if error due to undefined operation                               | On          |
| Store solution on file                                                 | Off         |
| Type of scaling                                                        | Automatic   |
| Manual scaling                                                         |             |
| Row equilibration                                                      | On          |
| Manual control of reassembly                                           | Off         |
| Load constant                                                          | On          |
| Constraint constant                                                    | On          |
| Mass constant                                                          | On          |
| Damping (mass) constant                                                | On          |
| Jacobian constant                                                      | On          |
| Constraint Jacobian constant                                           | On          |

## 9. Postprocessing

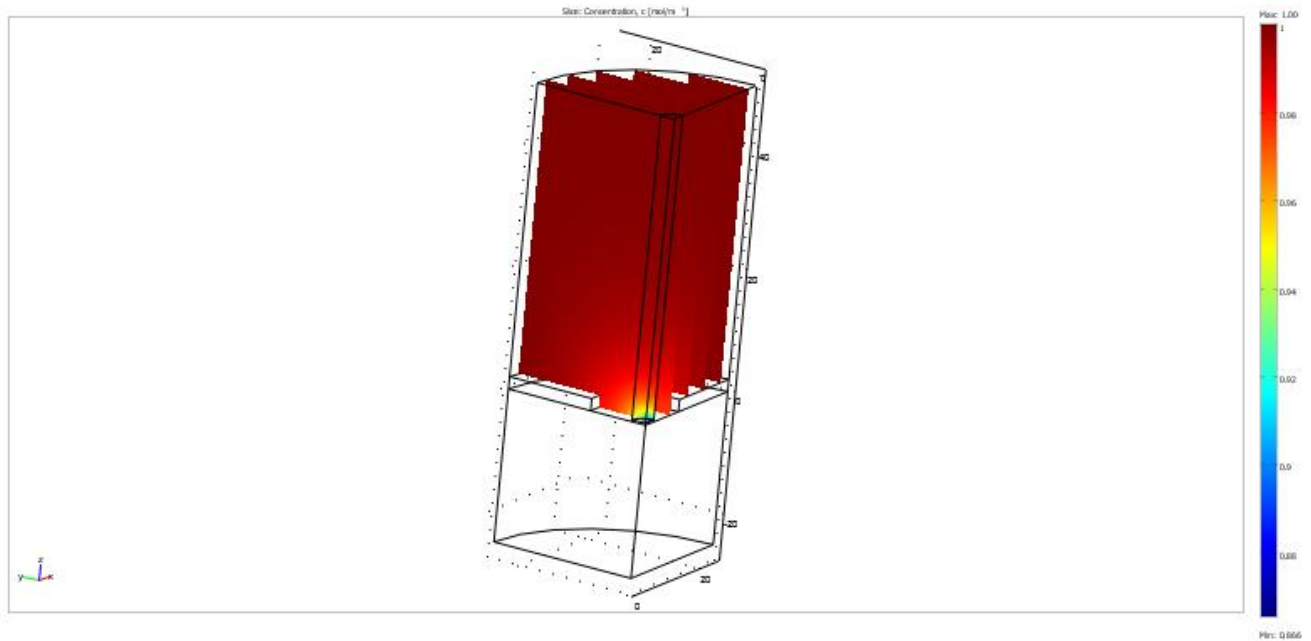

## 10. Variables

### 10.1. Boundary

#### 10.1.1. Boundary 1-3, 16, 18

| Name            | Description               | Unit                    | Expression                                                                                                     |
|-----------------|---------------------------|-------------------------|----------------------------------------------------------------------------------------------------------------|
| ndflux_c_chdi   | Normal diffusive flux, c  | mol/(m <sup>2</sup> *s) |                                                                                                                |
| ndflux_c2_chdi2 | Normal diffusive flux, c2 | mol/(m <sup>2</sup> *s) | $n_{x\_chdi2} * dflux\_c2\_x\_chdi2 + n_{y\_chdi2} * dflux\_c2\_y\_chdi2 + n_{z\_chdi2} * dflux\_c2\_z\_chdi2$ |

### 10.1.2. Boundary 4-5, 9, 11-13, 15, 17, 20-21

| Name            | Description               | Unit                    | Expression                                                                                   |
|-----------------|---------------------------|-------------------------|----------------------------------------------------------------------------------------------|
| ndflux_c_chdi   | Normal diffusive flux, c  | mol/(m <sup>2</sup> *s) | $nx\_chdi * dflux\_c\_x\_chdi + ny\_chdi * dflux\_c\_y\_chdi + nz\_chdi * dflux\_c\_z\_chdi$ |
| ndflux_c2_chdi2 | Normal diffusive flux, c2 | mol/(m <sup>2</sup> *s) |                                                                                              |

### 10.1.3. Boundary 6

| Name            | Description               | Unit                    | Expression                                                                                            |
|-----------------|---------------------------|-------------------------|-------------------------------------------------------------------------------------------------------|
| ndflux_c_chdi   | Normal diffusive flux, c  | mol/(m <sup>2</sup> *s) | $nx\_chdi * dflux\_c\_x\_chdi + ny\_chdi * dflux\_c\_y\_chdi + nz\_chdi * dflux\_c\_z\_chdi$          |
| ndflux_c2_chdi2 | Normal diffusive flux, c2 | mol/(m <sup>2</sup> *s) | $nx\_chdi2 * dflux\_c2\_x\_chdi2 + ny\_chdi2 * dflux\_c2\_y\_chdi2 + nz\_chdi2 * dflux\_c2\_z\_chdi2$ |

### 10.1.4. Boundary 7-8, 10, 14, 19, 22

| Name            | Description               | Unit                    | Expression |
|-----------------|---------------------------|-------------------------|------------|
| ndflux_c_chdi   | Normal diffusive flux, c  | mol/(m <sup>2</sup> *s) |            |
| ndflux_c2_chdi2 | Normal diffusive flux, c2 | mol/(m <sup>2</sup> *s) |            |

## 10.2. Subdomain

### 10.2.1. Subdomain 1

| Name             | Description                             | Unit                    | Expression                                                |
|------------------|-----------------------------------------|-------------------------|-----------------------------------------------------------|
| grad_c_x_chdi    | Concentration gradient, c, x component  | mol/m <sup>4</sup>      |                                                           |
| dflux_c_x_chdi   | Diffusive flux, c, x component          | mol/(m <sup>2</sup> *s) |                                                           |
| grad_c_y_chdi    | Concentration gradient, c, y component  | mol/m <sup>4</sup>      |                                                           |
| dflux_c_y_chdi   | Diffusive flux, c, y component          | mol/(m <sup>2</sup> *s) |                                                           |
| grad_c_z_chdi    | Concentration gradient, c, z component  | mol/m <sup>4</sup>      |                                                           |
| dflux_c_z_chdi   | Diffusive flux, c, z component          | mol/(m <sup>2</sup> *s) |                                                           |
| grad_c_chdi      | Concentration gradient, c               | mol/m <sup>4</sup>      |                                                           |
| dflux_c_chdi     | Diffusive flux, c                       | mol/(m <sup>2</sup> *s) |                                                           |
| grad_c2_x_chdi2  | Concentration gradient, c2, x component | mol/m <sup>4</sup>      | c2x                                                       |
| dflux_c2_x_chdi2 | Diffusive flux, c2, x component         | mol/(m <sup>2</sup> *s) | -Dxx_c2_chdi2 * c2x-Dxy_c2_chdi2 * c2y-Dxz_c2_chdi2 * c2z |
| grad_c2_y_chdi2  | Concentration gradient, c2, y component | mol/m <sup>4</sup>      | c2y                                                       |
| dflux_c2_y_chdi2 | Diffusive flux, c2, y component         | mol/(m <sup>2</sup> *s) | -Dyx_c2_chdi2 * c2x-Dyy_c2_chdi2 * c2y-Dyz_c2_chdi2 * c2z |

|                  |                                         |                         |                                                                                                    |
|------------------|-----------------------------------------|-------------------------|----------------------------------------------------------------------------------------------------|
| grad_c2_z_chdi2  | Concentration gradient, c2, z component | mol/m <sup>4</sup>      | c2z                                                                                                |
| dflux_c2_z_chdi2 | Diffusive flux, c2, z component         | mol/(m <sup>2</sup> *s) | -Dzx_c2_chdi2 * c2x-Dzy_c2_chdi2 * c2y-Dzz_c2_chdi2 * c2z                                          |
| grad_c2_chdi2    | Concentration gradient, c2              | mol/m <sup>4</sup>      | sqrt(grad_c2_x_chdi2 <sup>2</sup> +grad_c2_y_chdi2 <sup>2</sup> +grad_c2_z_chdi2 <sup>2</sup> )    |
| dflux_c2_chdi2   | Diffusive flux, c2                      | mol/(m <sup>2</sup> *s) | sqrt(dflux_c2_x_chdi2 <sup>2</sup> +dflux_c2_y_chdi2 <sup>2</sup> +dflux_c2_z_chdi2 <sup>2</sup> ) |

### 10.2.2. Subdomain 2

| Name             | Description                             | Unit                    | Expression                                                                                   |
|------------------|-----------------------------------------|-------------------------|----------------------------------------------------------------------------------------------|
| grad_c_x_chdi    | Concentration gradient, c, x component  | mol/m <sup>4</sup>      | cx                                                                                           |
| dflux_c_x_chdi   | Diffusive flux, c, x component          | mol/(m <sup>2</sup> *s) | -Dxx_c_chdi * cx-Dxy_c_chdi * cy-Dxz_c_chdi * cz                                             |
| grad_c_y_chdi    | Concentration gradient, c, y component  | mol/m <sup>4</sup>      | cy                                                                                           |
| dflux_c_y_chdi   | Diffusive flux, c, y component          | mol/(m <sup>2</sup> *s) | -Dyx_c_chdi * cx-Dyy_c_chdi * cy-Dyz_c_chdi * cz                                             |
| grad_c_z_chdi    | Concentration gradient, c, z component  | mol/m <sup>4</sup>      | cz                                                                                           |
| dflux_c_z_chdi   | Diffusive flux, c, z component          | mol/(m <sup>2</sup> *s) | -Dzx_c_chdi * cx-Dzy_c_chdi * cy-Dzz_c_chdi * cz                                             |
| grad_c_chdi      | Concentration gradient, c               | mol/m <sup>4</sup>      | sqrt(grad_c_x_chdi <sup>2</sup> +grad_c_y_chdi <sup>2</sup> +grad_c_z_chdi <sup>2</sup> )    |
| dflux_c_chdi     | Diffusive flux, c                       | mol/(m <sup>2</sup> *s) | sqrt(dflux_c_x_chdi <sup>2</sup> +dflux_c_y_chdi <sup>2</sup> +dflux_c_z_chdi <sup>2</sup> ) |
| grad_c2_x_chdi2  | Concentration gradient, c2, x component | mol/m <sup>4</sup>      |                                                                                              |
| dflux_c2_x_chdi2 | Diffusive flux, c2, x component         | mol/(m <sup>2</sup> *s) |                                                                                              |
| grad_c2_y_chdi2  | Concentration gradient, c2, y component | mol/m <sup>4</sup>      |                                                                                              |
| dflux_c2_y_chdi2 | Diffusive flux, c2, y component         | mol/(m <sup>2</sup> *s) |                                                                                              |
| grad_c2_z_chdi2  | Concentration gradient, c2, z           | mol/m <sup>4</sup>      |                                                                                              |

|                  |                                 |                         |  |
|------------------|---------------------------------|-------------------------|--|
|                  | component                       |                         |  |
| dflux_c2_z_chdi2 | Diffusive flux, c2, z component | mol/(m <sup>2</sup> *s) |  |
| grad_c2_chdi2    | Concentration gradient, c2      | mol/m <sup>4</sup>      |  |
| dflux_c2_chdi2   | Diffusive flux, c2              | mol/(m <sup>2</sup> *s) |  |

### 10.2.3. Subdomain 3-4

| Name             | Description                             | Unit                    | Expression |
|------------------|-----------------------------------------|-------------------------|------------|
| grad_c_x_chdi    | Concentration gradient, c, x component  | mol/m <sup>4</sup>      |            |
| dflux_c_x_chdi   | Diffusive flux, c, x component          | mol/(m <sup>2</sup> *s) |            |
| grad_c_y_chdi    | Concentration gradient, c, y component  | mol/m <sup>4</sup>      |            |
| dflux_c_y_chdi   | Diffusive flux, c, y component          | mol/(m <sup>2</sup> *s) |            |
| grad_c_z_chdi    | Concentration gradient, c, z component  | mol/m <sup>4</sup>      |            |
| dflux_c_z_chdi   | Diffusive flux, c, z component          | mol/(m <sup>2</sup> *s) |            |
| grad_c_chdi      | Concentration gradient, c               | mol/m <sup>4</sup>      |            |
| dflux_c_chdi     | Diffusive flux, c                       | mol/(m <sup>2</sup> *s) |            |
| grad_c2_x_chdi2  | Concentration gradient, c2, x component | mol/m <sup>4</sup>      |            |
| dflux_c2_x_chdi2 | Diffusive flux, c2, x component         | mol/(m <sup>2</sup> *s) |            |
| grad_c2_y_chdi2  | Concentration gradient, c2, y component | mol/m <sup>4</sup>      |            |
| dflux_c2_y_chdi2 | Diffusive flux, c2, y component         | mol/(m <sup>2</sup> *s) |            |
| grad_c2_z_chdi2  | Concentration gradient, c2, z component | mol/m <sup>4</sup>      |            |
| dflux_c2_z_chdi2 | Diffusive flux, c2, z component         | mol/(m <sup>2</sup> *s) |            |
| grad_c2_chdi2    | Concentration gradient, c2              | mol/m <sup>4</sup>      |            |
| dflux_c2_chdi2   | Diffusive flux, c2                      | mol/(m <sup>2</sup> *s) |            |
